# Supplementary material for: Virome assembly and annotation in brain tissue based on next‐generation sequencing
Source: PubMed Central journal article supplement (PMC7520322; doi:10.1002/cam4.3325), 2020-08-01

**A**Tree scale: 0.1 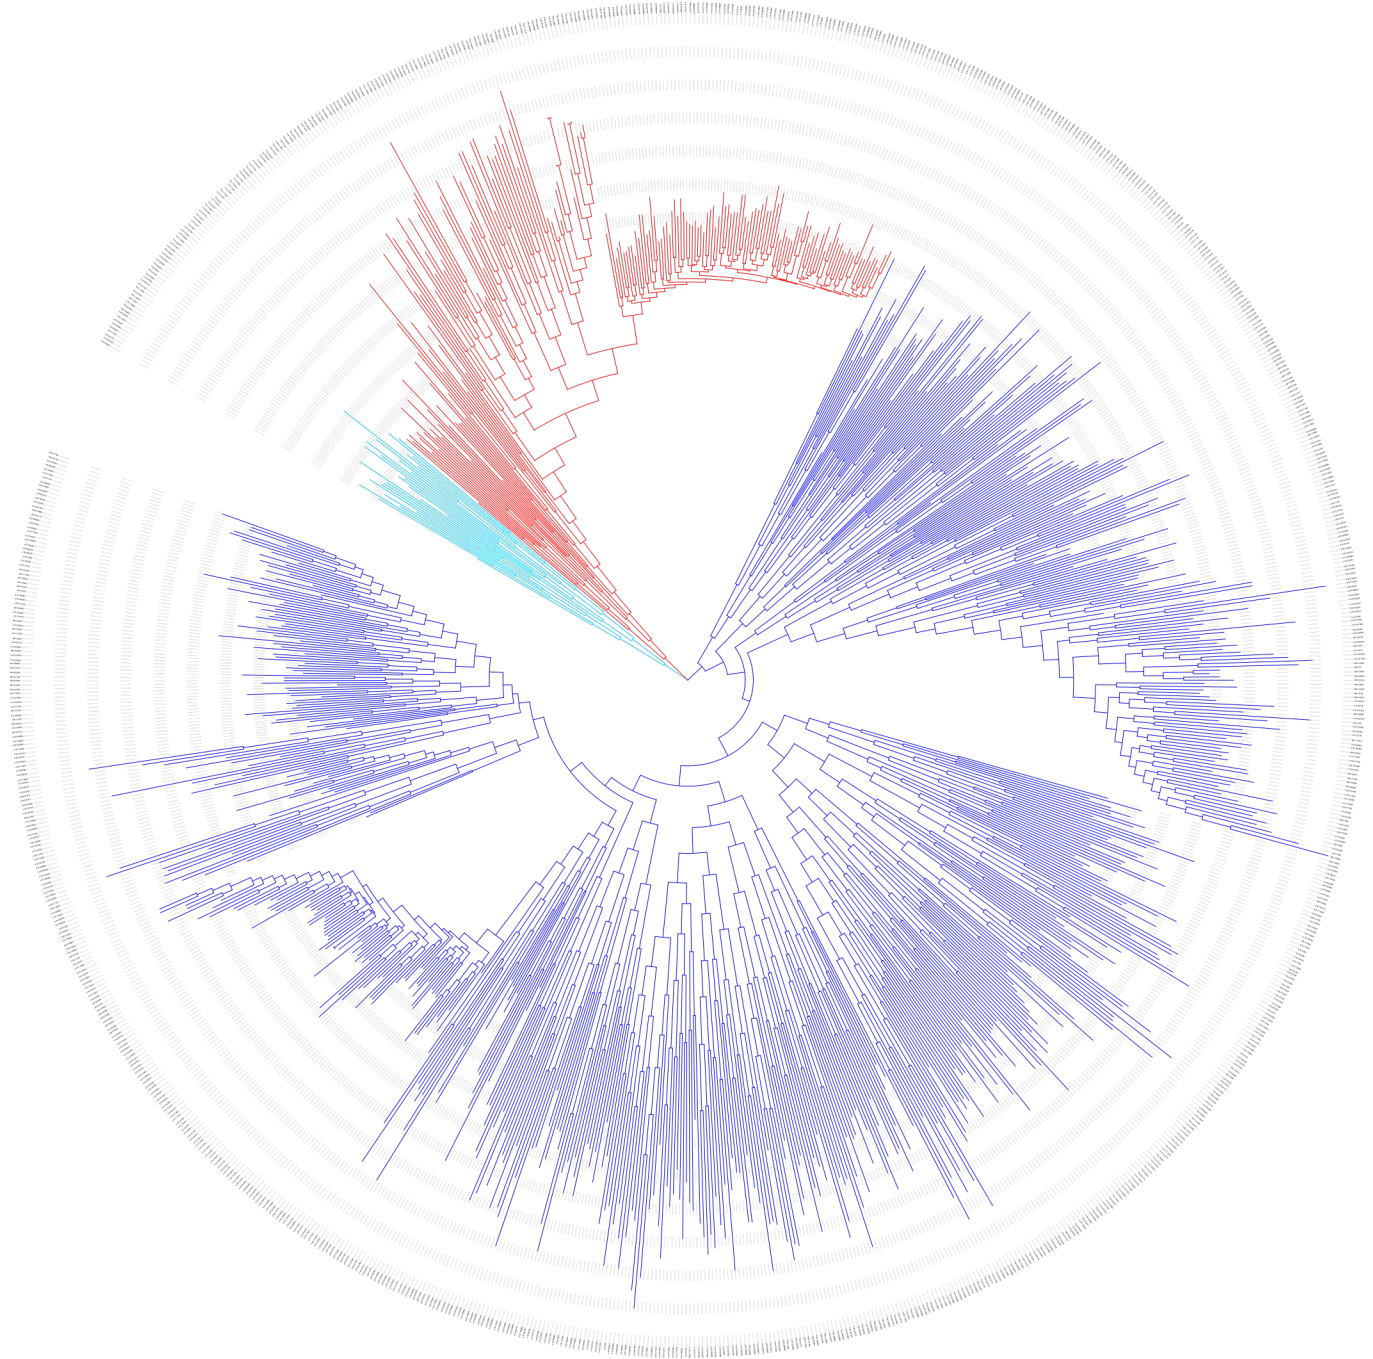**B**Tree scale: 0.1 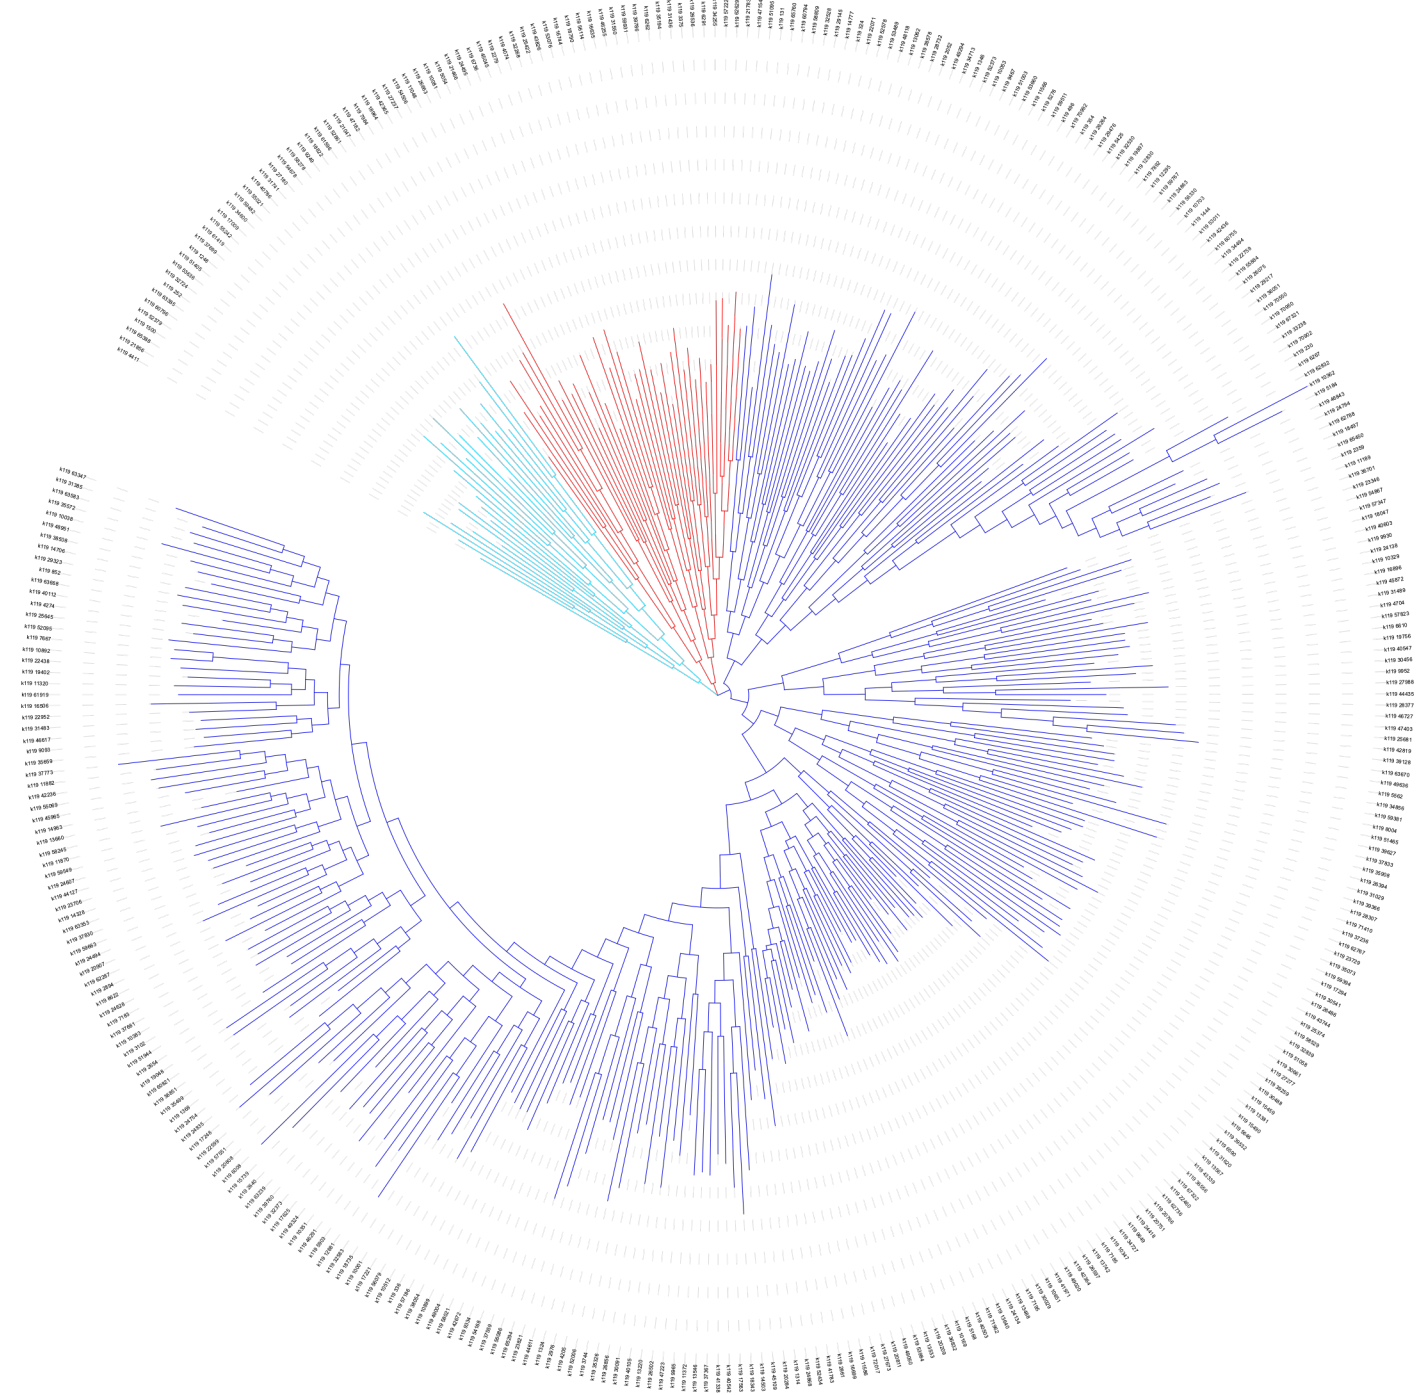

Supplement: CAM4-9-6776-s004.pdf [file CAM4-9-6776-s004.pdf]
