# Supplementary material for: Virome assembly and annotation in brain tissue based on next‐generation sequencing
Source: PubMed Central journal article supplement (PMC7520322; doi:10.1002/cam4.3325), 2020-08-01
Supplement: CAM4-9-6776-s005.pdf [file CAM4-9-6776-s005.pdf]

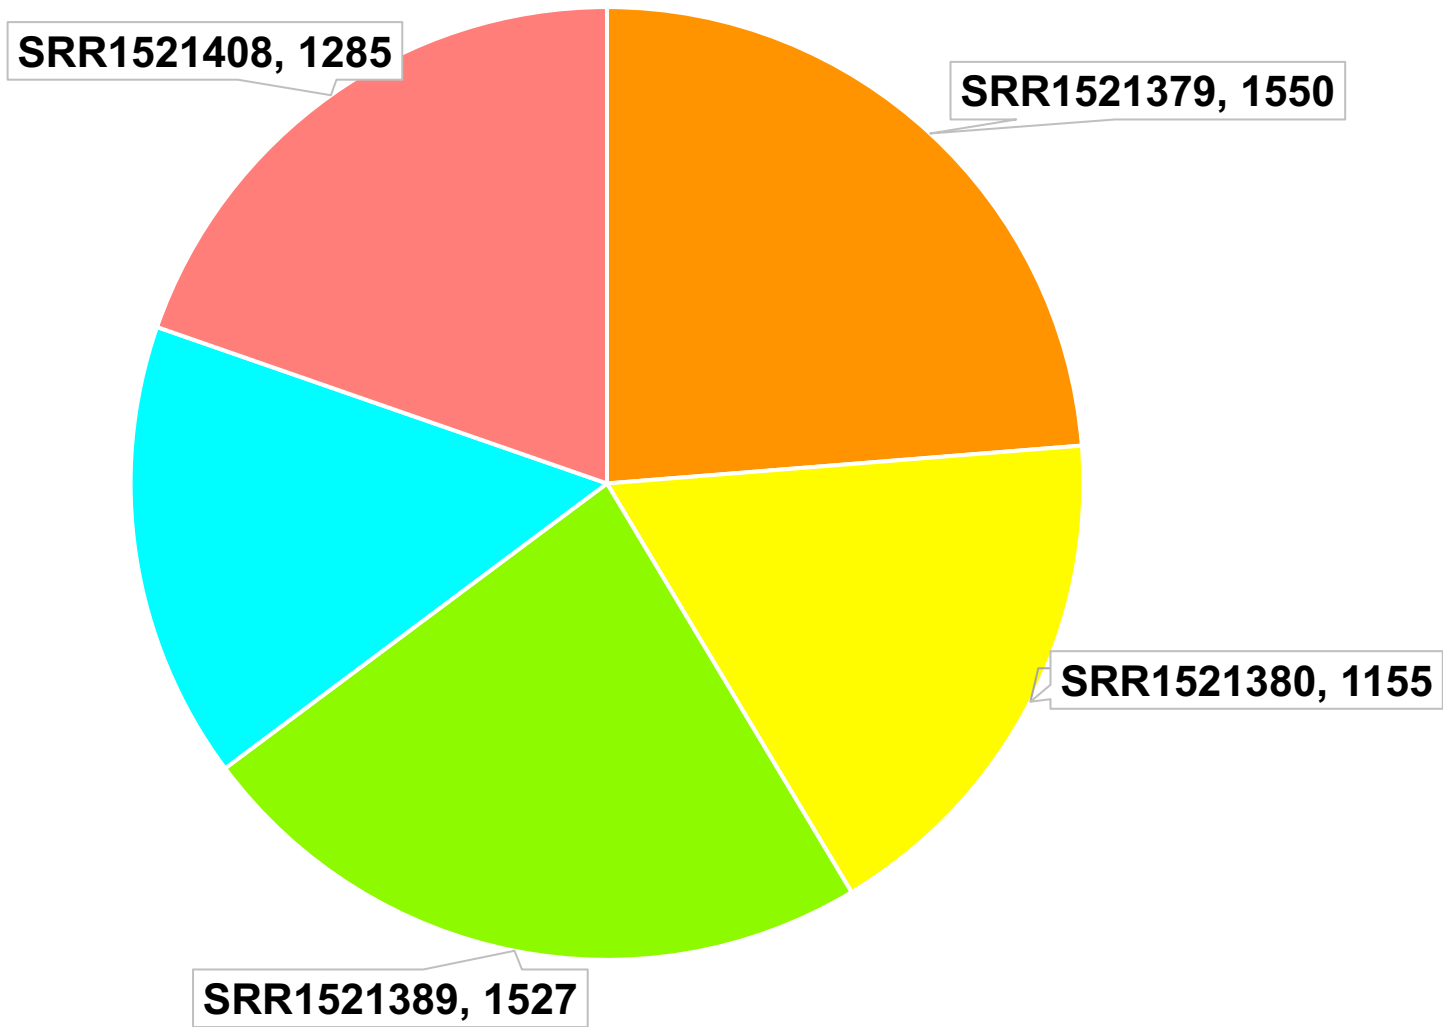

- SRR1521379
- SRR1521380
- SRR1521389
- SRR1521407
- SRR1521408
